# Supplementary material for: Dichlorofluorescein as a peroxidase mimic and its application to glucose detection
Source: Royal Society of Chemistry journal article supplement (doi:10.1039/c7nj01213f), 2017-01-01
Supplement: c7nj01213f1.pdf [file c7nj01213f1.pdf]

## **Electronic supplementary information**

### **Dichlorofluorescein as a peroxidase mimic and its application to glucose detection**

Menglu Li, Li Liu, Ying Shi, Yufang Yang, Huzhi Zheng, Yijuan Long\*

Key Laboratory on Luminescent and Real-Time Analytical Chemistry, Ministry of  
Education, College of Chemistry and Chemical Engineering, Southwest University,  
Chongqing 400715, P.R. China

Email: [yjlong@swu.edu.cn](mailto:yjlong@swu.edu.cn)

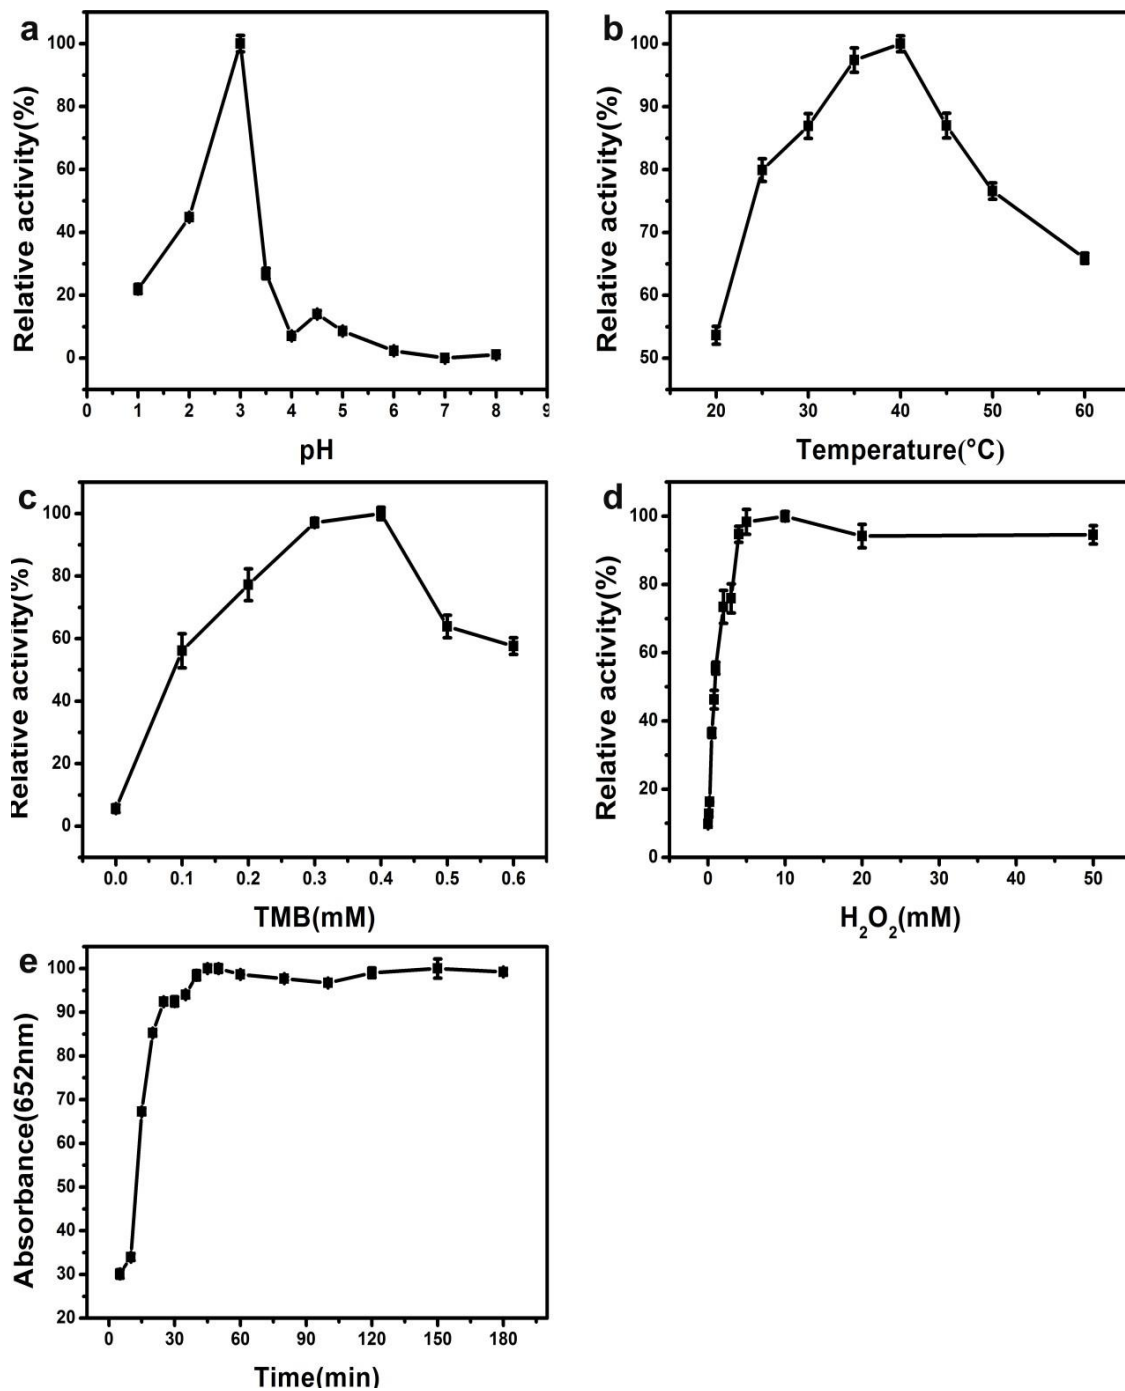

**Fig S1** Effects of (a) pH, (b) temperature, (c) TMB concentration, (d) H<sub>2</sub>O<sub>2</sub> concentration and (e) incubation time on the peroxidase mimetic activity of DCF. Experiments were carried out using 100  $\mu$ M DCF in the volume of 1.0 mL NaAc-HAc buffer ( 0.2 M, pH=3.0 ) at 40  $^{\circ}$ C with 0.40 mM TMB and 10 mM H<sub>2</sub>O<sub>2</sub> as substrates. The maximum point in each curve was set as 100%. The error bars represent the standard deviations derived from three independent measurements.

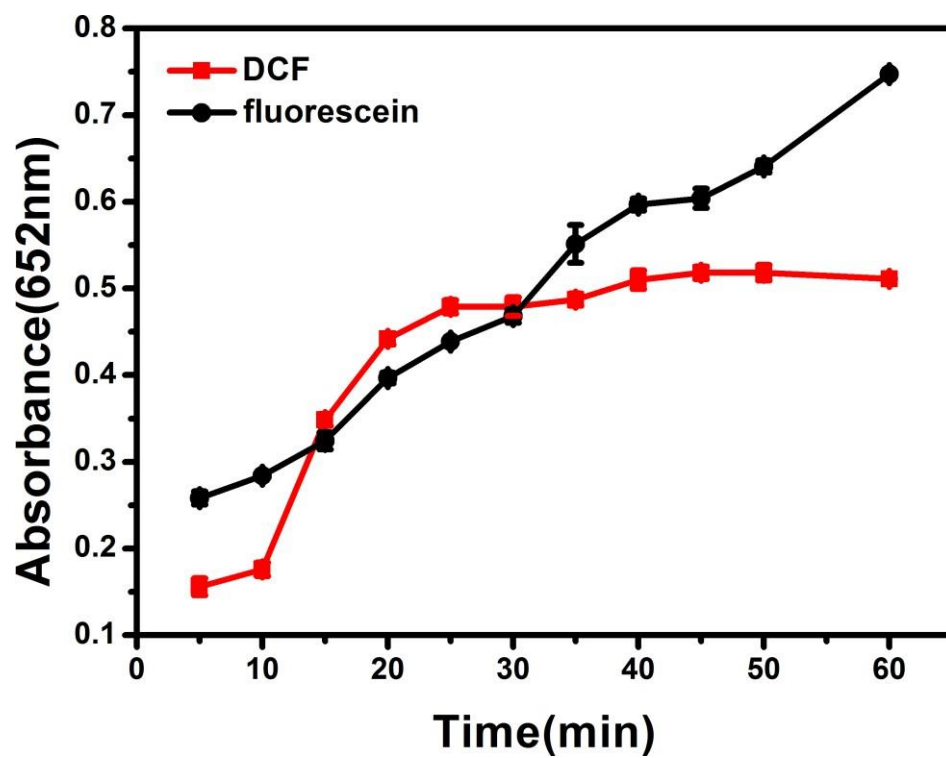

**Fig S2** Time-dependent absorbance changes at 652 nm of TMB using DCF and fluorescein as catalysts. Experiment were carried out using 100  $\mu$ M DCF and fluorescein in reaction volume of 2 mL, in 0.2 M NaAc-HAc buffer ( pH 3.0 ) , with 0.4 mM TMB and 10 mM H<sub>2</sub>O<sub>2</sub> contains

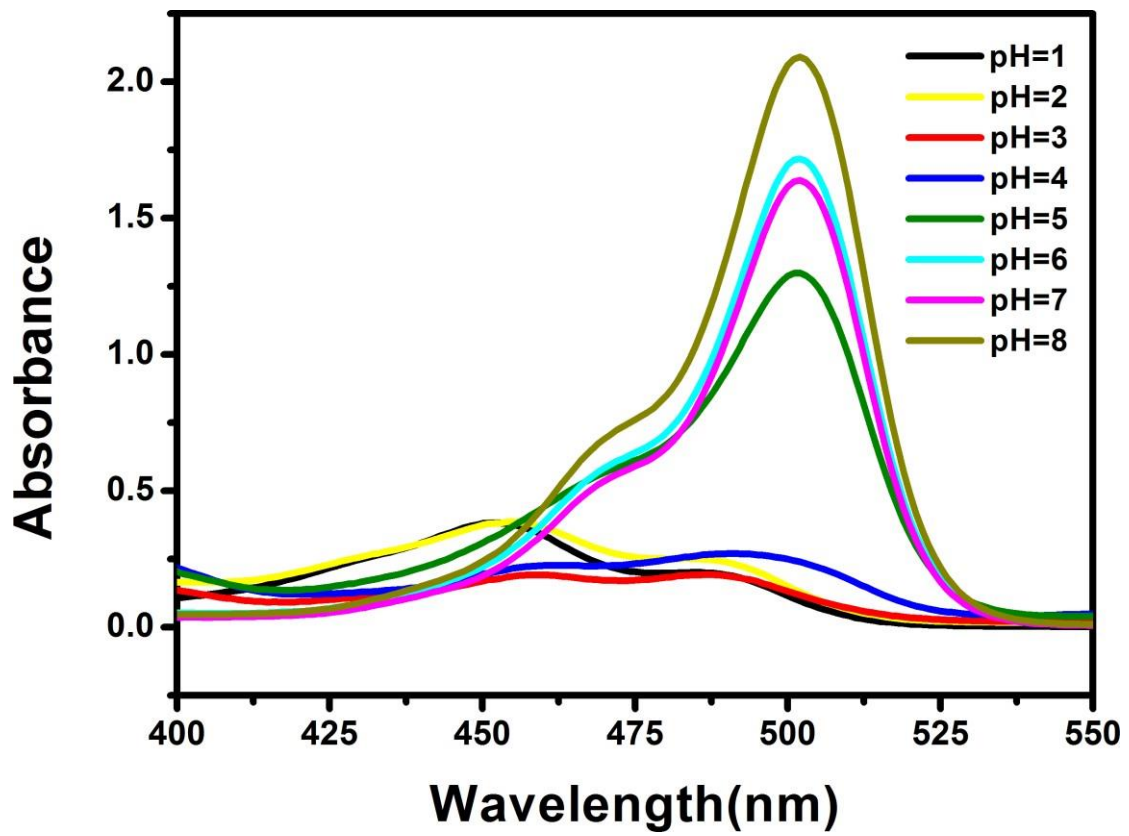

Fig S3 Absorption spectra of DCF at different pH values.

**Table S1** Comparison the present method with other methods for the detection of H<sub>2</sub>O<sub>2</sub>.

| <b>Materials</b>                    | <b>Linear rang<br/>(<math>\mu</math>M)</b> | <b>LOD (<math>\mu</math>M)</b> | <b>Reference</b> |
|-------------------------------------|--------------------------------------------|--------------------------------|------------------|
| CuZnFeS                             | 10-55                                      | 3                              | 1                |
| Co <sub>3</sub> O <sub>4</sub> NPs  | 50-25000                                   | 10                             | 2                |
| Fe <sub>3</sub> O <sub>4</sub> MNPs | 5-100                                      | 3                              | 3                |
| POM-pillared MOF                    | 10-50                                      | 1.4                            | 4                |
| CuO:GNS                             | 10-100                                     | 6.8                            | 5                |
| Pd@PEDOT                            | 10-100                                     | 4.8                            | 6                |
| FF@PW <sub>12</sub> @GO             | 1-75                                       | 0.1                            | 7                |
| MoS <sub>2</sub> nanosheets         | 5-100                                      | 1.5                            | 8                |
| Cu NCs                              | 10-1000                                    | 10                             | 9                |
| fluorescein                         | 80-1200                                    | 30                             | 10               |
| DCF                                 | 5-600                                      | 2                              | This work        |

**Table S2** Comparison the present method with other methods for the detection of glucose.

| <b>Materials</b>                       | <b>Linear rang<br/>(<math>\mu\text{M}</math>)</b> | <b>LOD(<math>\mu\text{M}</math>)</b> | <b>Reference</b> |
|----------------------------------------|---------------------------------------------------|--------------------------------------|------------------|
| Fe <sub>3</sub> O <sub>4</sub> MNPs    | 50-1000                                           | 30                                   | 3                |
| Au@p-SiO <sub>2</sub>                  | 20-500                                            | 20                                   | 11               |
| Gold nanorods                          | 100-1000                                          | 100                                  | 12               |
| Cu NCs                                 | 100-2000                                          | 100                                  | 9                |
| Au@Ag Heterogeneous NRs                | 50-20000                                          | 39                                   | 13               |
| FeIII(biuret-amide)                    | 20-300                                            | 10                                   | 14               |
| H <sub>2</sub> TCPP-NiO nanocomposites | 50-500                                            | 20                                   | 15               |
| PEI <sup>17</sup> <sub>3</sub> /CNT/GC | 0-300                                             | 50                                   | 16               |
| Au@Pt core/shell nanorods              | 45-400                                            | 45                                   | 17               |
| DCF                                    | 80-1200                                           | 30                                   | This work        |

## Reference

1. A. Dalui, B. Pradhan, U. Thupakula, A. H. Khan, G. S. Kumar, T. Ghosh, B. Satpati and S. Acharya, *Nanoscale.*, 2015, **7**, 9062-9074.
2. J. Mu, Y. Wang, M. Zhao and L. Zhang, *Chem. Commun.*, 2012, **48**, 2540-2542.
3. H. Wei and E. Wang, *Anal. Chem.*, 2008, **80**, 2250-2254.
4. E.-L. Zhou, C. Qin, P. Huang, X.-L. Wang, W.-C. Chen, K.-Z. Shao and Z.-M. Su, *Chem. Eur. J.*, 2015, **21**, 11894-11898.
5. V. Sharma and S. M. Mobin, *Sens. Actuators, B.*, 2017, **240**, 338-348.
6. M. Chi, G. Nie, Y. Jiang, Z. Yang, Z. Zhang, C. Wang and X. Lu, *ACS Appl. Mater. Interfaces.*, 2016, **8**, 1041-1049.
7. Z. Ma, Y. Qiu, H. Yang, Y. Huang, J. Liu, Y. Lu, C. Zhang and P. Hu, *ACS Appl. Mater. Interfaces.*, 2015, **7**, 22036-22045.
8. T. Lin, L. Zhong, L. Guo, F. Fu and G. Chen, *Nanoscale.*, 2014, **6**, 11856-11862.
9. L. Hu, Y. Yuan, L. Zhang, J. Zhao, S. Majeed and G. Xu, *Anal. Chim. Acta.*, 2013, **762**, 83-86.
10. L. Liu, Y. Shi, Y. Yang, M. Li, Y. Long, Y. Huang and H. Zheng, *Chem. Commun.*, 2016, **52**, 13912-13915.
11. A. Samanta, B. B. Dhar and R. N. Devi, *New J. Chem.*, 2012, **36**, 2625.
12. X. Liu, S. Zhang, P. Tan, J. Zhou, Y. Huang, Z. Nie and S. Yao, *Chem. Commun.*, 2013, **49**, 1856-1858.
13. L. Han, C. Li, T. Zhang, Q. Lang and A. Liu, *ACS Appl. Mater. Interfaces.*, 2015, **7**, 14463-14470.
14. B. Malvi, C. Panda, B. B. Dhar and S. S. Gupta, *Chem. Commun.*, 2012, **48**, 5289.
15. Q. Liu, Y. Yang, H. Li, R. Zhu, Q. Shao, S. Yang and J. Xu, *Biosens. Bioelectron.*, 2015, **64**, 147-153.
16. C. Deng, J. Chen, Z. Nie and S. Si, *Biosens. Bioelectron.*, 2010, **26**, 213-219.
17. J. Liu, X. Hu, S. Hou, T. Wen, W. Liu, X. Zhu, J.-J. Yin and X. Wu, *Sens. Actuators, B.*, 2012, **166-167**, 708-714.
